# Supplementary material
Source: publisher site journal article supplement (https://www.dovepress.com/get_supplementary_file.php?f=281162.docx)
Supplement: Supplementary file 1 [file get_supplementary_file.php]

**Supplementary materials**

**Association Between Rural Residence and In-Hospital and 30-day Mortality Among Veterans Hospitalized with COPD Exacerbations**

Spyridon Fortis MD

Amy M.J. O’Shea PhD

Brice F Beck MAE

Alejandro Comellas MD

Mary Vaughan Sarrazin PhD

Peter J Kaboli MD, MS

**Supplementary Table 1.** Univariate analysis in-hospital mortality.

|  | **OR** | **OR 95%CI** | **P value** |
| --- | --- | --- | --- |
| **Age per 10 years** | 1.64 | 1.58, 1.70 | <0.001 |
| **Female** | 0.68 | 0.55, 0.84 | <0.001 |
| **Rural Residence** |  |  |  |
| **Urban** | *ref* | *ref* | *ref* |
| **Rural** | 1.13 | 1.04, 1.22 | 0.002 |
| **Isolated Rural** | 1.06 | 0.89, 1.27 | 0.488 |
| **Race** |  |  |  |
| **White** | *ref* | *ref* | *ref* |
| **Black** | 0.55 | 0.49, 0.62 | <0.001 |
| **Other** | 0.99 | 0.81, 1.21 | 0.913 |
| **Missing** | 1.10 | 0.91, 1.34 | 0.319 |
| **Area Deprivation Index, per decile** | 0.96 | 0.93, 0.99 | 0.016 |
| **Comorbidities** |  |  |  |
| **Obstructive sleep Apnea** | 0.49 | 0.45, 0.53 | <0.001 |
| **Diabetes** | 1.17 | 1.08, 1.27 | <0.001 |
| **Congestive heart failure** | 1.82 | 1.68, 1.97 | <0.001 |
| **Pneumonia** | 0.78 | 0.73, 0.84 | <0.001 |
| **Hypertension** | 2.43 | 2.24, 2.64 | <0.001 |
| **Peripheral vascular disease** | 1.64 | 1.49, 1.81 | <0.001 |
| **Cancer** | 1.90 | 1.73, 2.09 | <0.001 |
| **Coronary artery disease** | 2.28 | 2.08, 2.50 | <0.001 |
| **Chronic kidney disease** | 1.73 | 1.56, 1.90 | <0.001 |
| **Cerebrovascular disease** | 1.75 | 1.57, 1.96 | <0.001 |
| **Liver Disease** | 1.30 | 1.11, 1.53 | 0.001 |
| **Rheumatoid arthritis** | 1.55 | 1.21, 1.98 | <0.001 |
| **Peptic ulcer** | 1.66 | 1.28, 2.15 | <0.001 |
| **Acquired immunodeficiency syndrome** | 0.94 | 0.52, 1.71 | 0.847 |
| **Dementia** | 2.71 | 2.20, 3.35 | <0.001 |
| **Admission Source** |  |  |  |
| **Outpatient** | *ref* | *ref* | *ref* |
| **Acute Care Hospital** | 14.94 | 13.62, 16.39 | <0.001 |
| **Nursing Home** | 3.36 | 2.75, 4.11 | <0.001 |
| **Unknown/Other Facility** | 23.26 | 20.69, 26.14 | <0.001 |
| **Hospital Complexity** |  |  |  |
| **High resource** | *ref* | *ref* | *ref* |
| **Medium resource** | 1.62 | 1.44, 1.82 | <0.001 |
| **Low resource** | 2.05 | 1.80, 2.34 | <0.001 |
| **Labs** |  |  |  |
| **Hematocrit per 5%** | 0.60 | 0.57, 0.62 | <0.001 |
| **White blood cells per 5 109 cells/L** | 1.33 | 1.29, 1.38 | <0.001 |
| **Sodium per 5** **mmol/L** | 1.00 | 0.95, 1.06 | 0.931 |
| **Blood Urea Nitrogen per 10** **mg/dL** | 1.11 | 1.10, 1.13 | <0.001 |
| **Creatinine per 0.3 mg/dL** | 1.03 | 1.03, 1.04 | <0.001 |

Each variable represents a univariate model with in-hospital mortality as the dependent variable (outcome).

OR = Odds ratio.

**Supplementary Table 2.** Univariate analysis 30-day mortality.

|  | **OR** | **OR 95%CI** | **P value** |
| --- | --- | --- | --- |
| **Age per 10 years** | 1.57 | 1.53, 1.62 | <0.001 |
| **Female** | 0.64 | 0.53, 0.77 | <0.001 |
| **Rural Residence** |  |  |  |
| **Urban** | *ref* | *ref* | *ref* |
| **Rural** | 1.21 | 1.14, 1.29 | <0.001 |
| **Isolated Rural** | 1.12 | 0.97, 1.30 | 0.130 |
| **Race** |  |  |  |
| **White** | *ref* | *ref* | *ref* |
| **Black** | 0.60 | 0.54, 0.66 | <0.001 |
| **Other** | 1.03 | 0.86, 1.22 | 0.765 |
| **Missing** | 1.06 | 0.89, 1.27 | 0.514 |
| **Area Deprivation Index, per decile** | 1.00 | 0.97, 1.02 | 0.805 |
| **Comorbidities** |  |  |  |
| **Obstructive sleep Apnea** | 0.56 | 0.53, 0.60 | <0.001 |
| **Diabetes** | 1.12 | 1.04, 1.20 | 0.002 |
| **Congestive heart failure** | 1.74 | 1.62, 1.86 | <0.001 |
| **Pneumonia** | 0.83 | 0.78, 0.88 | <0.001 |
| **Hypertension** | 1.98 | 1.84, 2.13 | <0.001 |
| **Peripheral vascular disease** | 1.62 | 1.48, 1.76 | <0.001 |
| **Cancer** | 1.96 | 1.81, 2.11 | <0.001 |
| **Coronary artery disease** | 1.96 | 1.81, 2.13 | <0.001 |
| **Chronic kidney disease** | 1.71 | 1.57, 1.86 | <0.001 |
| **Cerebrovascular disease** | 1.55 | 1.40, 1.71 | <0.001 |
| **Liver Disease** | 1.25 | 1.09, 1.44 | 0.001 |
| **Rheumatoid arthritis** | 1.43 | 1.14, 1.79 | 0.002 |
| **Peptic ulcer** | 1.71 | 1.36, 2.14 | <0.001 |
| **Acquired immunodeficiency syndrome** | 0.95 | 0.54, 1.67 | 0.859 |
| **Dementia** | 2.24 | 1.85, 2.71 | <0.001 |
| **Admission Source** |  |  |  |
| **Outpatient** | *ref* | *ref* | *ref* |
| **Acute Care Hospital** | 5.64 | 5.19, 6.13 | <0.001 |
| **Nursing Home** | 4.11 | 3.56, 4.75 | <0.001 |
| **Unknown/Other Facility** | 5.26 | 4.69, 5.91 | <0.001 |
| **Hospital Complexity** |  |  |  |
| **High resource** | *ref* | *ref* | *ref* |
| **Medium resource** | 1.32 | 1.18, 1.47 | <0.001 |
| **Low resource** | 1.11 | 0.97, 1.27 | 0.127 |
| **Labs** |  |  |  |
| **Hematocrit per 5%** | 0.63 | 0.61, 0.65 | <0.001 |
| **White blood cells per 5 109 cells/L** | 1.27 | 1.24, 1.31 | <0.001 |
| **Sodium per 5 mmol/L** | 0.99 | 0.95, 1.03 | 0.542 |
| **Blood Urea Nitrogen per 10 mg/dL** | 1.14 | 1.12, 1.16 | <0.001 |
| **Creatinine per 0.3 mg/dL** | 1.03 | 1.03, 1.04 | <0.001 |

Each variable represents a univariate model with in-hospital mortality as the dependent variable (outcome).

OR = Odds ratio.

**Supplementary Table 3.** Association of rural residence with in-hospital mortality in various multivariable logistic regression models.

|  | **OR** | **OR 95%CI** | **P value** |
| --- | --- | --- | --- |
| **Model 1 (univariate): patient rurality** |  |  |  |
| **Urban** | *ref* | *ref* | *ref* |
| **Rural** | 1.006 | 1.002, 1.010 | 0.003 |
| **Isolated Rural** | 1.003 | 0.994, 1.012 | 0.50 |
| **Model 2: patient rurality + demographics + comorbidities** |  |  |  |
| **Urban** | *ref* | *Ref* | *ref* |
| **Rural** | 1.002 | 0.998, 1.006 | 0.24 |
| **Isolated Rural** | 0.998 | 0.989, 1.007 | 0.65 |
| **Model 3: patient rurality + rural hospital** |  |  |  |
| **Urban** | *ref* | *Ref* | *ref* |
| **Rural** | 1.005 | 1.001, 1.010 | 0.015 |
| **Isolated Rural** | 1.002 | 0.993, 1.011 | 0.71 |
| **Model 4: patient rurality + COPD-volume hospital** |  |  |  |
| **Urban** | *ref* | *Ref* | *ref* |
| **Rural** | 1.005 | 1.001, 1.010 | 0.010 |
| **Isolated Rural** | 1.000 | 0.991, 1.008 | 0.93 |
| **Model 5: patient rurality + patient admission source** |  |  |  |
| **Urban** | *ref* | *Ref* | *ref* |
| **Rural** | 0.997 | 0.994, 1.001 | 0.17 |
| **Isolated Rural** | 0.995 | 0.987, 1.004 | 0.27 |
| **Model 6: patient rurality + Hospital Complexity** |  |  |  |
| **Urban** | *ref* | *Ref* | *ref* |
| **Rural** | 0.995 | 0.986, 1.004 | 0.25 |
| **Isolated Rural** | 1.002 | 0.998, 1.006 | 0.29 |
| **Model 7: patient rurality + Area Deprivation Index** |  |  |  |
| **Urban** | *ref* | *Ref* | *ref* |
| **Rural** | 0.997 | 0.993, 1.002 | 0.21 |
| **Isolated Rural** | 1.002 | 1.000, 1.004 | 0.11 |

OR for the association of patient rurality with in- hospital mortality. Patient rurality is forced in the models.

OR = Odds ratio.

Low and high COPD-case volume hospitals were defined as hospitals with the annual rate of COPD admissions below and above the median.

**Supplementary Table 4**. Source of admission in black and white veterans admitted with a COPD exacerbation.

| **Admission source** | **Black (n=10,540)** | **White (n=49,860)** | **P Value** |
| --- | --- | --- | --- |
| **Outpatient** | 9,871 (93.7) | 44,816 (89.9) | <0.001 |
| **Acute Care Hospital** | 296 (2.8) | 2,636 (5.3) |
| **Nursing Home** | 230 (2.2) | 1,001 (2.0) |
| **Unknown/Other Facility** | 143 (1.4) | 1,407 (2.8) |

Chi-square was used for comparisons between black and white patients.

**Supplementary Table 5.** Unadjusted in-hospital mortality stratified by travel time to primary care clinic, and VA hospital.

| **Group** | **Variable** | **Category** | **n** | **Hospital Mortality**  **n (%)** | **p-value** |
| --- | --- | --- | --- | --- | --- |
| **All Patients**  **(n=64,914)** | **Travel Time to Primary Care Clinic** | **Q1: [0, 9)** | 14,458 | 707 (4.9%) | 0.017 |
| **Q2: [9, 15)** | 15,484 | 713 (4.6%) |
| **Q3: [15, 27)** | 17,093 | 847 (5.0%) |
| **Q4: [27, 237]** | 15,723 | 846 (5.4%) |
| **Travel Time to VA Medical Center** | **Q1: [0, 11.21)** | 16,206 | 914 (5.6%) | 0.004 |
| **Q2: [11.21, 24.52)** | 16,228 | 793 (4.9%) |
| **Q3: [24.52, 54.70)** | 16,199 | 783 (4.8%) |
| **Q4: [54.70, 460.85]** | 16,214 | 833 (5.1%) |
| **Urban Patients**  **(n=43,549)** | **Travel Time to Primary Care Clinic** | **Q1: [0, 8)** | 10,109 | 486 (4.8%) | 0.053 |
| **Q2: [8, 12)** | 9,835 | 422 (4.3%) |
| **Q3: [12, 18)** | 11,279 | 570 (5.1%) |
| **Q4: [18, 174]** | 10,854 | 537 (5.0%) |
| **Travel Time to VA Medical Center** | **Q1: [0, 8.81)** | 10,876 | 632 (5.8%) | <0.001 |
| **Q2: [8.81, 16.34)** | 10,881 | 537 (4.9%) |
| **Q3: [16.34, 30.71)** | 10,871 | 493 (4.5%) |
| **Q4: [30.71, 354.42]** | 10,879 | 487 (4.5%) |
| **Rural Patients**  **(n=18,673)** | **Travel Time to Primary Care Clinic** | **Q1: [0, 18)** | 4,368 | 242 (5.5%) | 0.33 |
| **Q2: [18, 29)** | 4,446 | 222 (5.0%) |
| **Q3: [29, 41)** | 4,722 | 243 (5.2%) |
| **Q4: [41, 237]** | 4,534 | 262 (5.8%) |
| **Travel Time to VA Medical Center** | **Q1: [0, 33.95)** | 4,662 | 271 (5.8%) | 0.79 |
| **Q2: [33.95, 55.36)** | 4,666 | 257 (5.5%) |
| **Q3: [55.36, 83.87)** | 4,660 | 249 (5.3%) |
| **Q4: [83.87, 460.85]** | 4,662 | 256 (5.5%) |
| **Isolated Rural Patients**  **(n=2,692)** | **Travel Time to Primary Care Clinic** | **Q1: [0, 31)** | 618 | 26 (4.2%) | 0.58 |
| **Q2: [31, 43)** | 670 | 30 (4.5%) |
| **Q3: [43, 57)** | 648 | 36 (5.6%) |
| **Q4: [57, 222]** | 675 | 37 (5.5%) |
| **Travel Time to VA Medical Center** | **Q1: [0, 57.19)** | 678 | 41 (6.1%) | 0.23 |
| **Q2: [57.19, 85.82)** | 667 | 41 (6.2%) |
| **Q3: [85.82, 120.64)** | 673 | 27 (4.0%) |
| **Q4: [120.64, 378.49]** | 672 | 32 (4.8%) |

Hospital mortality between quartiles was compared by Cochran-Armitage Trend Test.

PCP= primary care physician, Q1 = first (shortest travel time) quartile, Q2 = second quartile, Q3= third quartile , Q4 = fourth (longest travel time) quartile, VAMC= VA hospital.

**Supplementary Table 6.** Multivariable logistic regression model for in-hospital mortality.

|  | **OR** | **OR 95%CI** | **P value** |
| --- | --- | --- | --- |
| **Age per 10 years** | 1.37 | 1.21, 1.54 | <0.001 |
| **Female** | 0.85 | 0.47, 1.56 | 0.601 |
| **Rural Residence** |  |  |  |
| **Urban** | *ref* | *ref* | *ref* |
| **Rural** | 0.87 | 0.67, 1.12 | 0.282 |
| **Isolated Rural** | 0.70 | 0.38, 1.29 | 0.255 |
| **Race** |  |  |  |
| **White** | *ref* | *ref* | *ref* |
| **Black** | 0.88 | 0.62, 1.25 | 0.476 |
| **Other** | 1.30 | 0.71, 2.40 | 0.394 |
| **Missing** | 0.95 | 0.48, 1.88 | 0.881 |
| **Area Deprivation Index** **per decile** | 1.03 | 0.98, 1.08 | 0.264 |
| **Comorbidities** |  |  |  |
| **Obstructive sleep Apnea** | 0.51 | 0.39, 0.67 | <0.001 |
| **Diabetes** | 1.05 | 0.80, 1.38 | 0.713 |
| **Congestive heart failure** | 1.51 | 1.11, 2.06 | 0.009 |
| **Pneumonia** | 0.92 | 0.73, 1.15 | 0.461 |
| **Hypertension** | 1.35 | 0.99, 1.83 | 0.055 |
| **Peripheral vascular disease** | 0.89 | 0.63, 1.26 | 0.522 |
| **Cancer** | 1.30 | 0.96, 1.76 | 0.086 |
| **Coronary artery disease** | 1.24 | 0.86, 1.77 | 0.251 |
| **Chronic kidney disease** | 0.74 | 0.51, 1.09 | 0.124 |
| **Cerebrovascular disease** | 1.36 | 0.95, 1.95 | 0.093 |
| **Liver Disease** | 1.16 | 0.71, 1.91 | 0.550 |
| **Rheumatoid arthritis** | 1.65 | 0.78, 3.47 | 0.188 |
| **Peptic ulcer** | 0.62 | 0.25, 1.56 | 0.311 |
| **Dementia** | 1.67 | 0.93, 3.00 | 0.088 |
| **Admission Source** |  |  |  |
| **Outpatient** | *ref* | *ref* | *ref* |
| **Acute Care Hospital** | 12.97 | 9.80, 17.16 | <0.001 |
| **Nursing Home** | 2.64 | 1.49, 4.69 | 0.001 |
| **Unknown/Other Facility** | 33.05 | 22.66, 48.21 | <0.001 |
| **Hospital Complexity** |  |  |  |
| **High resource** | *ref* | *ref* | *ref* |
| **Medium resource** | 1.02 | 0.67, 1.57 | 0.920 |
| **Low resource** | 1.11 | 0.73, 1.68 | 0.638 |
| **Labs** |  |  |  |
| **Hematocrit per 5%** | 0.65 | 0.58, 0.73 | <0.001 |
| **White blood cells per 5 109 cells/L** | 1.27 | 1.19, 1.35 | <0.001 |
| **Blood Urea Nitrogen per 10 mg/dL** | 1.08 | 1.06, 1.10 | <0.001 |
| **Creatinine per 0.3 mg/dL** | 0.96 | 0.91, 1.00 | 0.056 |

OR = odds ratio.

**Supplementary Table 7.** Multivariable logistic regression model for 30-day mortality.

|  | **OR** | **OR 95%CI** | **P value** |
| --- | --- | --- | --- |
| **Age per 10 years** | 1.33 | 1.28, 1.38 | <0.001 |
| **Female** | 0.72 | 0.58, 0.90 | 0.004 |
| **Rural Residence** |  |  |  |
| **Urban** | *ref* | *ref* | *ref* |
| **Rural** | 1.13 | 1.04, 1.22 | 0.002 |
| **Isolated Rural** | 1.08 | 0.91, 1.28 | 0.382 |
| **Race** |  |  |  |
| **White** | *ref* | *ref* | *ref* |
| **Black** | 0.73 | 0.65, 0.81 | <0.001 |
| **Other** | 1.16 | 0.96, 1.39 | 0.118 |
| **Missing** | 0.99 | 0.81, 1.21 | 0.917 |
| **Comorbidities** |  |  |  |
| **Obstructive sleep Apnea** | 0.66 | 0.61, 0.71 | <0.001 |
| **Diabetes** | 0.88 | 0.80, 0.96 | 0.006 |
| **Congestive heart failure** | 1.27 | 1.16, 1.40 | <0.001 |
| **Pneumonia** | 0.77 | 0.72, 0.83 | <0.001 |
| **Hypertension** | 1.14 | 1.03, 1.27 | 0.011 |
| **Peripheral vascular disease** | 1.04 | 0.93, 1.16 | 0.486 |
| **Cancer** | 1.45 | 1.32, 1.60 | <0.001 |
| **Coronary artery disease** | 1.15 | 1.03, 1.29 | 0.016 |
| **Chronic kidney disease** | 0.87 | 0.77, 0.98 | 0.022 |
| **Cerebrovascular disease** | 1.04 | 0.92, 1.18 | 0.506 |
| **Liver Disease** | 1.31 | 1.12, 1.53 | 0.001 |
| **Rheumatoid arthritis** | 1.18 | 0.91, 1.53 | 0.200 |
| **Peptic ulcer** | 1.22 | 0.95, 1.56 | 0.124 |
| **Dementia** | 1.21 | 0.96, 1.52 | 0.108 |
| **Admission Source** |  |  |  |
| **Outpatient** | *ref* | *ref* | *ref* |
| **Acute Care Hospital** | 3.02 | 2.69, 3.39 | <0.001 |
| **Nursing Home** | 3.02 | 2.58, 3.53 | <0.001 |
| **Unknown/Other Facility** | 2.36 | 1.88, 2.96 | <0.001 |
| **Hospital Complexity** |  |  |  |
| **High resource** | *ref* | *ref* | *ref* |
| **Medium resource** | 1.04 | 0.91, 1.19 | 0.557 |
| **Low resource** | 0.63 | 0.52, 0.77 | <0.001 |
| **Labs** |  |  |  |
| **Hematocrit per 5%** | 0.70 | 0.68, 0.73 | <0.001 |
| **White blood cells per 5 109 cells/L** | 1.26 | 1.22, 1.30 | <0.001 |
| **Blood Urea Nitrogen per 10 mg/dL** | 1.08 | 1.07, 1.09 | <0.001 |
| **Creatinine per 0.3 mg/dL** | 1.00 | 0.99, 1.01 | 0.394 |

OR = odds ratio.
